# Supplementary material for: Centrifugation-free and high yield synthesis of nanosized H-ZSM-5 and its structure-guided aromatization of methanol to 1,2,4-trimethylbenzene
Source: Royal Society of Chemistry journal article supplement (doi:10.1039/c4ta04444d), 2014-01-01
Supplement: c4ta04444d1.pdf [file c4ta04444d1.pdf]

## Supporting Information for

# Centrifugation-free and high yield synthesis of nanosized H-ZSM-5 and its structure-guided aromatization of methanol to 1, 2, 4-trimethylbenzene

Kui Shen<sup>ab</sup>, Weizhong Qian<sup>a</sup>, Ning Wang<sup>a</sup>, Chang Su<sup>a</sup>, and Fei Wei<sup>a</sup>

<sup>a</sup>Beijing Key Laboratory of Green Chemical Reaction Engineering and Technology, Department of Chemical Engineering, Tsinghua University, Beijing 100084, PR China.

<sup>b</sup>School of Chemistry and Chemical Engineering, South China University of Technology, Guangzhou 510640, P.R.China.

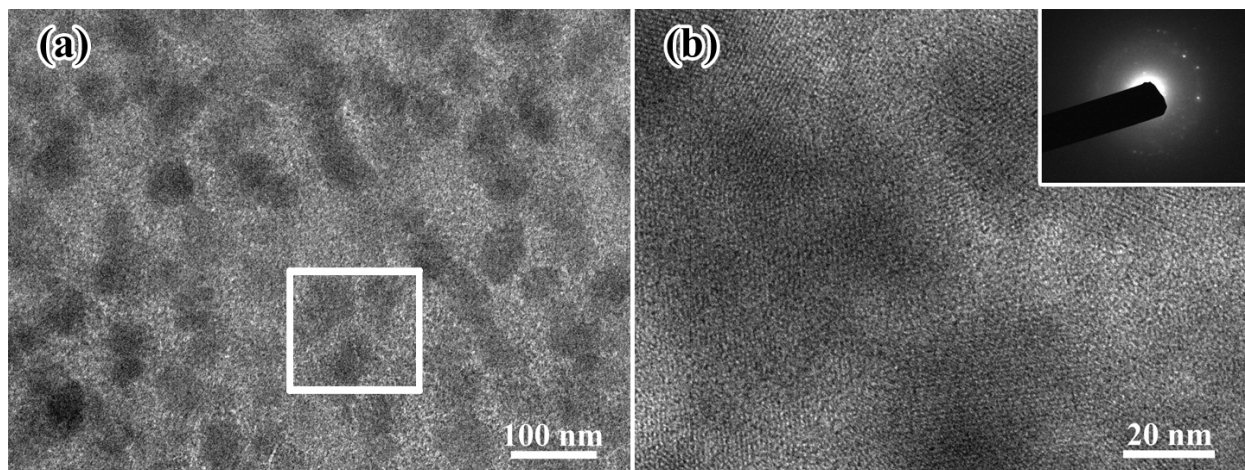

Figure S1 SEM image of the TEM images of the gel after pre-aging, which is composed by ZSM-5 nuclei and a lot of unreacted amorphous silica.

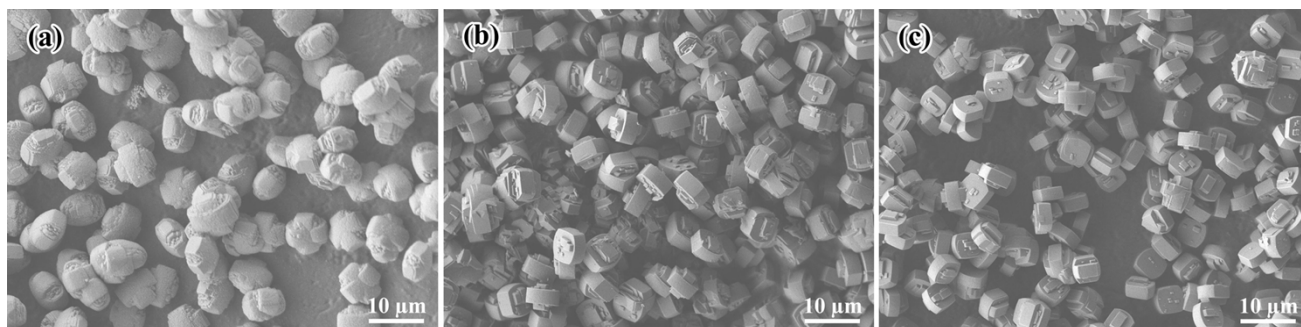

Figure S2 SEM image of the (a) CZS-30, (b) CZS-60 and (c) CZS-90, which demonstrate the conventional ZSM-5 is in micron level.

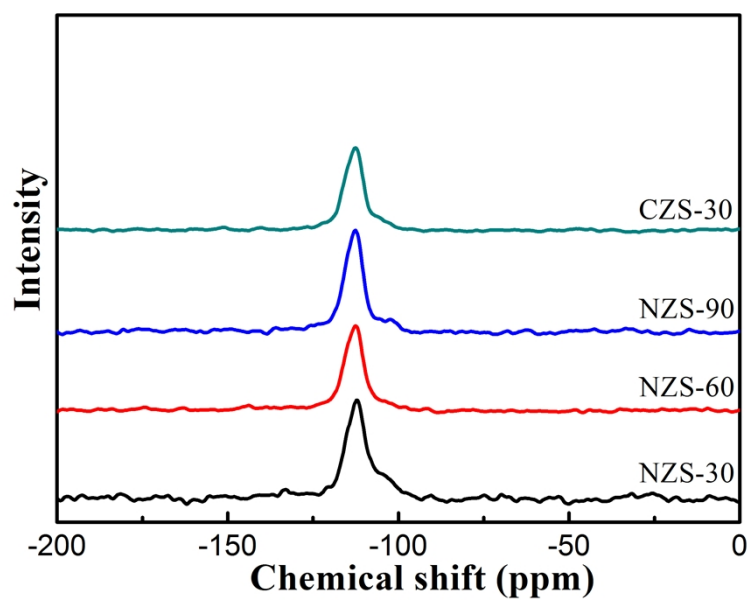

1  
2 Figure S3  $^{29}\text{Si}$  NMR spectra of NZS-30, NZS-60, NZS-90 and CZS-30. The shoulder peak at -104 ppm indicates  
3 successful incorporation of aluminum atoms into the nanosized ZSM-5 framework.
